# Supplementary material for: Tailored Made Fabrication of Flexible Dendrimer-Hydrogel Composites with Physical Cross-linking and Study of Swelling Behaviour
Source: Research Square preprint supplement (doi:10.21203/rs.3.rs-7748571/v1), 2025-11-04
Supplement: Supplementary file 1 [file 1a19ce18868d8d2aa492ba26.docx]

**Tailored Made Fabrication of Flexible Dendrimer-Hydrogel Composites with Physical Cross-linking and Study of Swelling Behaviour**

**Tailored Made Fabrication of Flexible Dendrimer-Hydrogel Composites with Physical Cross-linking and Study of Swelling Behaviour**

Nandkishor B. Shirsath1, Tulsidas S. Savale1, Milind C. Nagare2, Tejasvini K. More3, and Chandana B. Roy*4,

1 Department of Chemistry, MGV’s Maharaja Sayajirao Gaikwad Arts, Science and Commerce College, Malegaon Camp, (Autonomous) 423 105, INDIA

2Department of Chemistry, MGV’s Arts, Science and Commerce College, Manmad, (Autonomous) 423 104, INDIA

3 MGV’s College of Education, Malegaon Camp Dist. Nashik

4School of Chemical Sciences, KBC-North Maharashtra University, Jalgaon, -425 001 INDIA

**Corresponding author: roychandana2010@gmail.com*

Email: [*drjsmeshram@gmail.com*](mailto:drjsmeshram@gmail.com)

**Solubility:** DMSO, ethanol, methanol, acetonitrile, and DMF solvents.

**IR of KBr: υmax/cm-1**= 3278 cm-1 (O-H stretching), 3066 cm-1 (N-H stretching), 2837 cm-1 (C-H aliphatic, stretching), 1639 cm-1 (C=O amide, stretching), 1546 cm-1 (C=C aromatic, stretching), 1407 cm-1 (C=N stretching), 1278 cm-1 (C-O aromatic, stretching).

**1HNMR (**400 MHz, CDCl3, TMS, s =singlet, d = doublet, t = triplet, h = heptet, m = multiplet): (δ, ppm)= 2.30-3.91(m, 52H, CH2), 4.28 (s, 4H, -OH) 6.77-6.88 (m, 16H, Ar-H); 7.26-7.98 (m,4H, CH); 8.36-8.54 (m, 8H, NH)

**Figure 5.3:** FTIR spectra of EDTPA1.

**Figure 5.4:** FTIR spectra of AA-EDTPA1-5%.

**Figure 5.5:** FTIR spectra of AA-EDTPA1-10%.

**Figure 5.6:** FTIR spectra of AA-EDTPA1-15%.

**Figure 5.7:** 1HNMR spectra of dendrimer
